# Supplementary material for: Pre-treatment Serum HE4 Level as a Novel Independent Prognostic Biomarker for Uterine Cervical Carcinoma Patients
Source: Front Oncol. 2020 Sep 29;10:584022. doi: 10.3389/fonc.2020.584022 (PMC7550621; doi:10.3389/fonc.2020.584022)
Supplement: Supplementary file 1 [file Table_1.XLSX]

## Sheet: Foglio1
Supplementary Table S1: sHE4 values in negative control women (NC) and uterine cervical carcinoma (UCC) patients.
Samples	HE4 pmol/L		Samples	HE4 pmol/L
NC1	29.1		UCC1	36.4
NC2	30.6		UCC2	199.8
NC3	45.2		UCC3	41.7
NC4	41.7		UCC4	62.2
NC5	32		UCC5	42
NC6	41.7		UCC6	65.6
NC7	47.7		UCC7	49.3
NC8	32		UCC8	57.2
NC9	39.1		UCC9	121.4
NC10	42.7		UCC10	44.8
NC11	31.8		UCC11	56.7
NC12	23.9		UCC12	47.7
NC13	41.9		UCC13	43.5
NC14	34.5		UCC14	36.1
NC15	23.4		UCC15	22.6
NC16	35.2		UCC16	27.8
NC17	26.6		UCC17	69
NC18	41.6		UCC18	51.2
NC19	39.9		UCC19	61.7
NC20	40.7		UCC20	135.4
NC21	34.7		UCC21	120.5
NC22	34.1		UCC22	34.7
NC23	37.3		UCC23	59.2
NC24	34.9		UCC24	34.1
NC25	21.6		UCC25	31.1
NC26	23.6		UCC26	47.2
NC27	44.3		UCC27	44
NC28	35.2		UCC28	44.8
NC29	38.3		UCC29	30.6
NC30	37		UCC30	37.8
NC31	29.8		UCC31	6.9
NC32	36.2		UCC32	35.2
NC33	26.5		UCC33	33.5
NC34	43.6		UCC34	37.6
NC35	35.4		UCC35	29.8
NC36	25.8		UCC36	40.3
NC37	24.8		UCC37	43.5
NC38	21.6		UCC38	44.4
NC39	33.7		UCC39	46
NC40	31.9		UCC40	43.9
NC41	62.9		UCC41	26.1
NC42	39.9		UCC42	39.2
NC43	25.1		UCC43	36.4
NC44	38.7		UCC44	31.6
NC45	27.4		UCC45	37.6
NC46	32.5		UCC46	35.2
NC47	51.9		UCC47	31.4
NC48	26		UCC48	37.2
NC49	32.8		UCC49	41.1
NC50	42.6		UCC50	33.6
NC51	41.6		UCC51	35.7
NC52	31.6		UCC52	35
NC53	30.7		UCC53	84
NC54	49.2		UCC54	551
NC55	38.4		UCC55	55.7
NC56	46.8		UCC56	31.1
NC57	39		UCC57	46.7
NC58	28.2		UCC58	334.2
NC59	27.6		UCC59	49.9
NC60	42.5		UCC60	44.7
NC61	39.6		UCC61	72.8
NC62	32.2		UCC62	52.7
NC63	32		UCC63	74.9
NC64	30.3		UCC64	52
NC65	32.8		UCC65	45.8
NC66	39		UCC66	47.7
NC67	52.8		UCC67	133.9
NC68	31.6		UCC68	165.2
NC69	43.8		UCC69	171.5
NC70	32.4		UCC70	155.2
NC71	33.5		UCC71	58.4
NC72	27.2		UCC72	65.1
NC73	35.1		UCC73	68.4
NC74	55.2		UCC74	41.3
NC75	48.5		UCC75	38.2
NC76	36.8		UCC76	38.8
NC77	39.6		UCC77	37.2
NC78	50		UCC78	38.1
NC79	31.6		UCC79	71.9
NC80	37.8		UCC80	59.2
NC81	37.2		UCC81	65.7
NC82	31.5		UCC82	51
NC83	37.7		UCC83	37.2
NC84	40.1		UCC84	51
NC85	30.1		UCC85	44.5
NC86	36.1		UCC86	36.1
NC87	45.4		UCC87	68.2
NC88	36.1		UCC88	89.7
NC89	32.2		UCC89	66.2
NC90	33.5		UCC90	38.6
NC91	70.4		UCC91	56.7
NC92	50.8		UCC92	56.7
NC93	38.9		UCC93	107.5
NC94	69.4		UCC94	55.9
NC95	43.9		UCC95	44.6
NC96	44.6		UCC96	32.4
NC97	37.8		UCC97	111.8
NC98	68.8		UCC98	66.4
NC99	39.8		UCC99	48
			UCC100	142.2
			UCC101	81.1
			UCC102	85.7
			UCC103	43
			UCC104	127
			UCC105	44.6
			UCC106	30.5
			UCC107	99.9
			UCC108	1071.6
			UCC109	1227.6
